# Supplementary material
Source: Springer Nature journal article supplement (https://www.springermedizin.de/resource/supplementary/12990_2009_257_MOESM8_ESM.pdf/9612900)

## A Sham

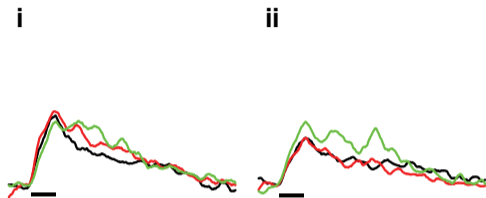

## B SNL

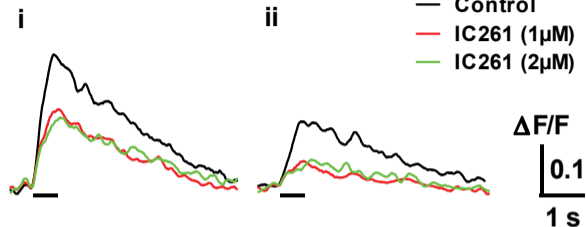

## C

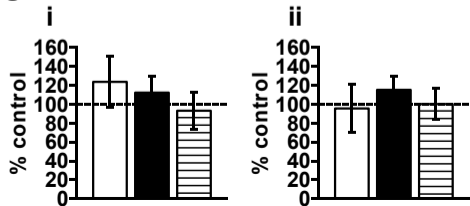

## D

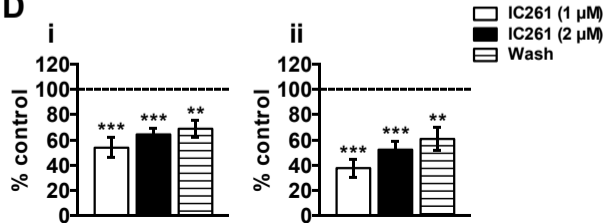

Supplement: MOESM8 [file 9612900]
